# Supplementary material for: A novel protein encoded by circRsrc1 regulates mitochondrial ribosome assembly and translation during spermatogenesis
Source: PubMed Central journal article supplement (PMC10127071; doi:10.1186/s12915-023-01597-z), 2023-04-24

# Fig. S1

a

circAp2b1 VELSLPR

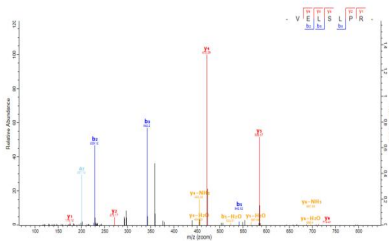

circNbas ASETALR

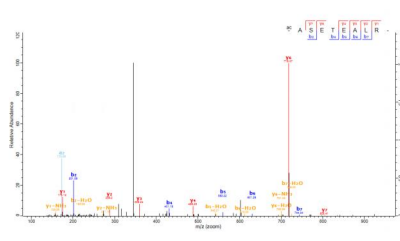

circClptm1 TSQALEGPHVSPAETYSRK

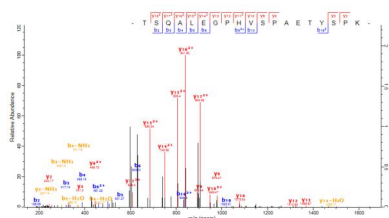

circRsph1 MGPQGPETMSK

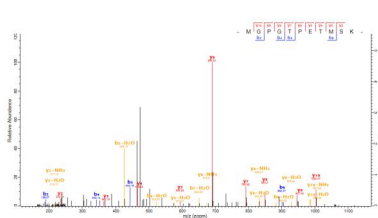

circLekr1 MKEIDMLNK

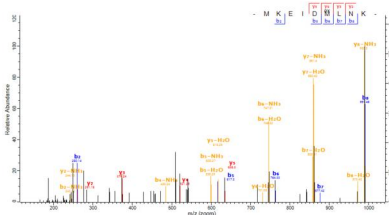

circSmarrc2 TANQQVSVQGGAVPVSGR

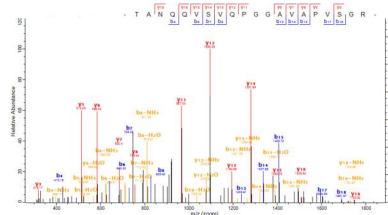

circLin9 MFHSSKISPMK

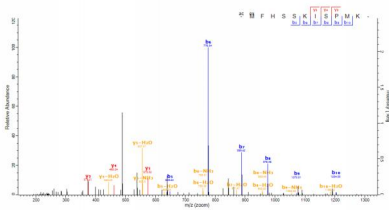

circZnrf2 NGLKSIDLQSTPQTKHSR

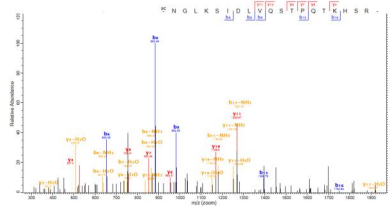

**Fig. S2****a**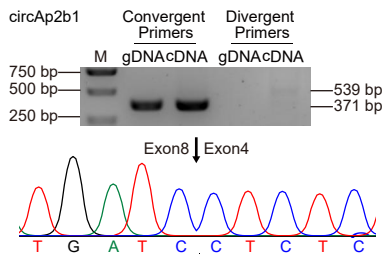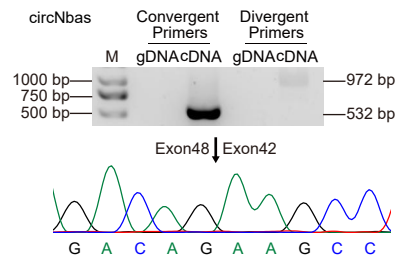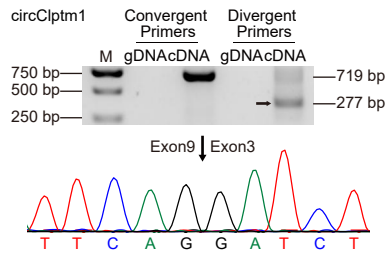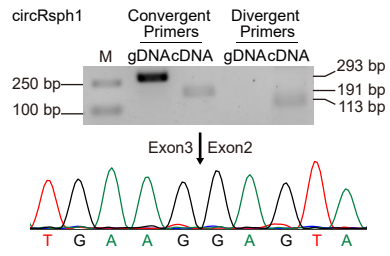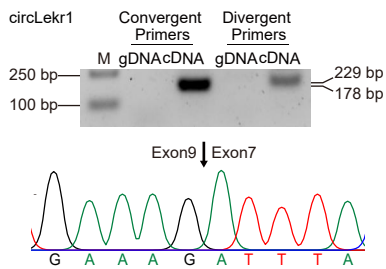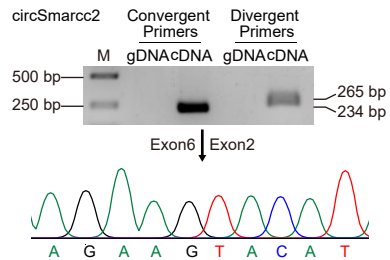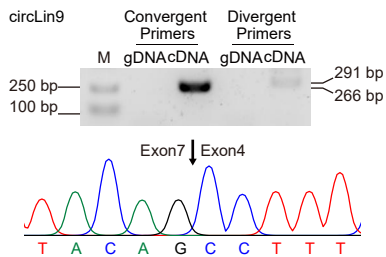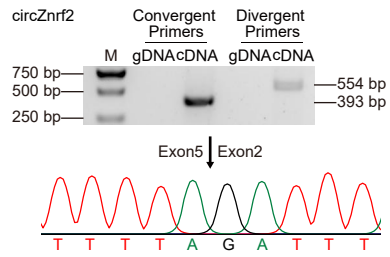

**Fig. S3**

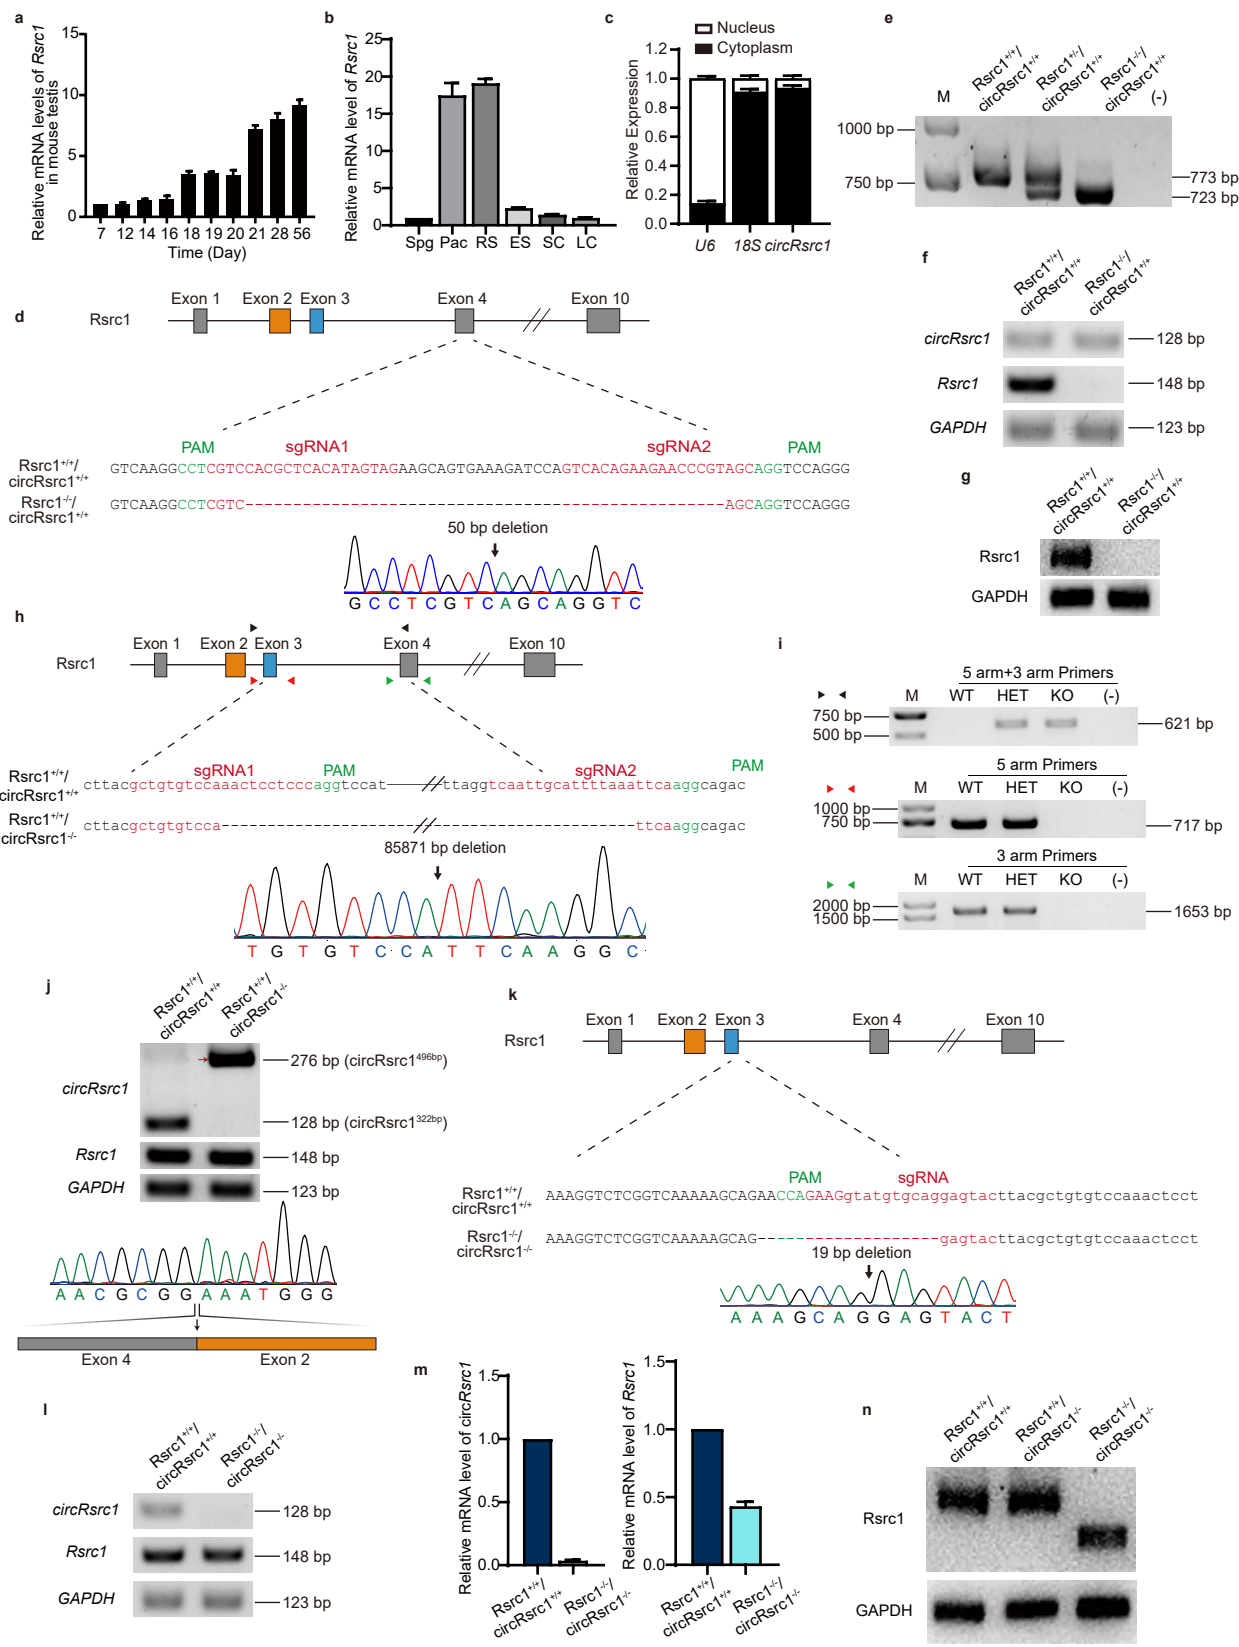

**Fig. S4**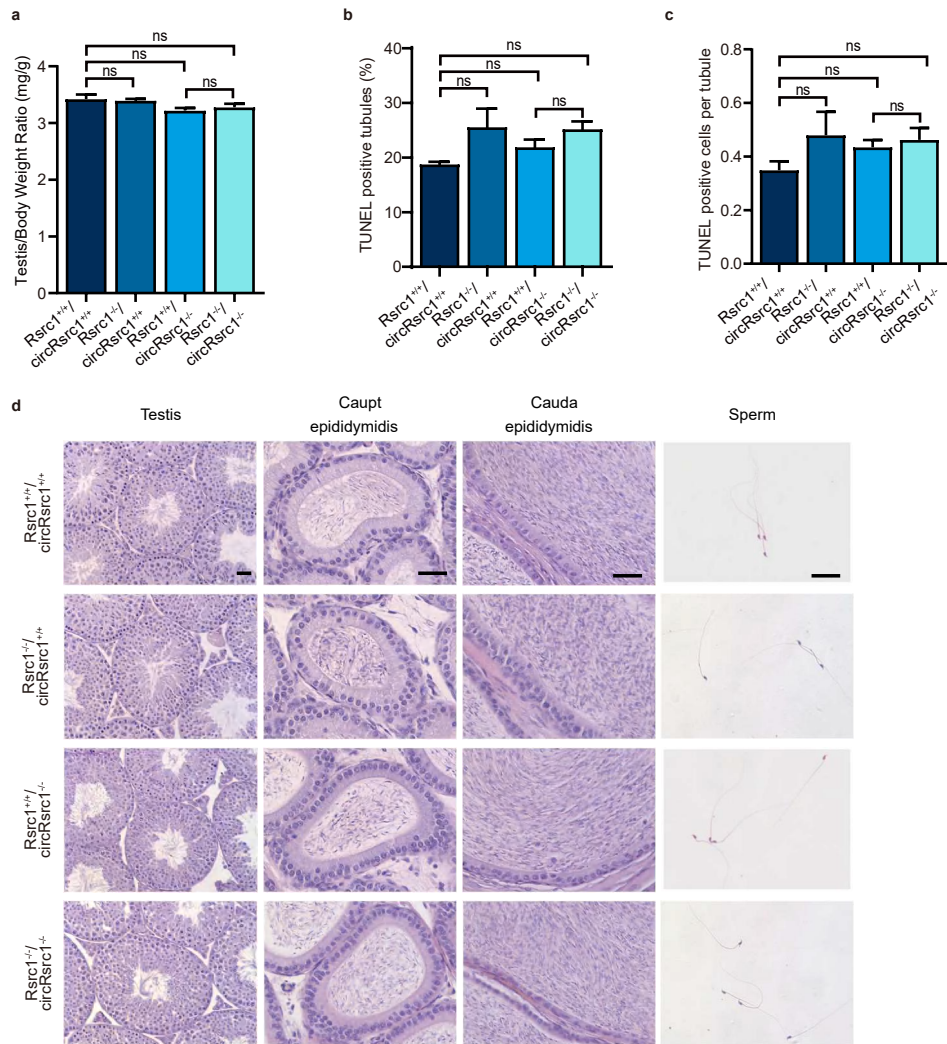

**Fig. S5**

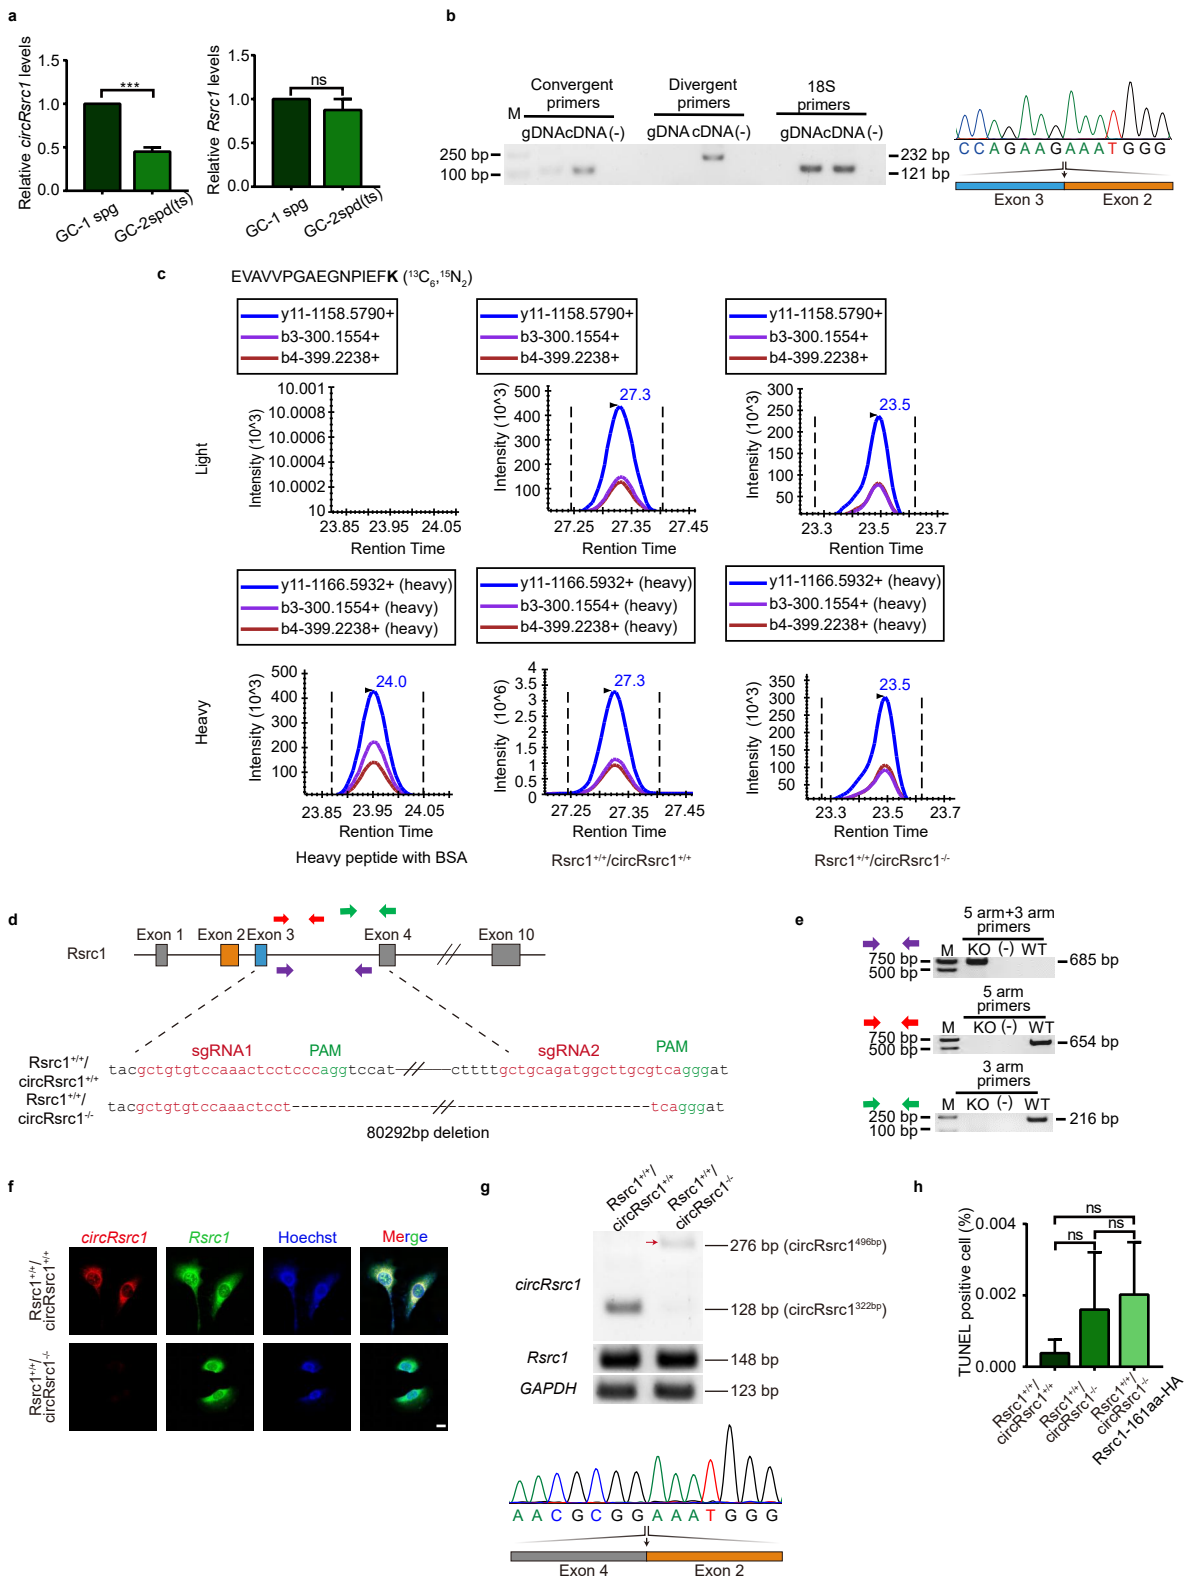

**Fig. S6**

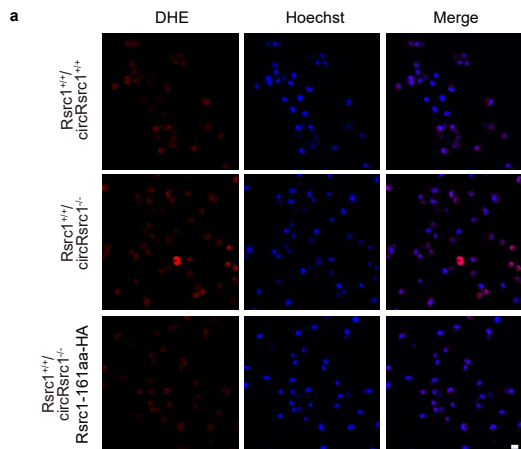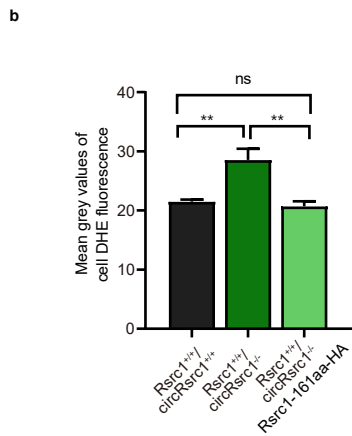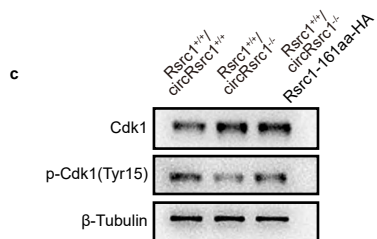

**Fig. S7**

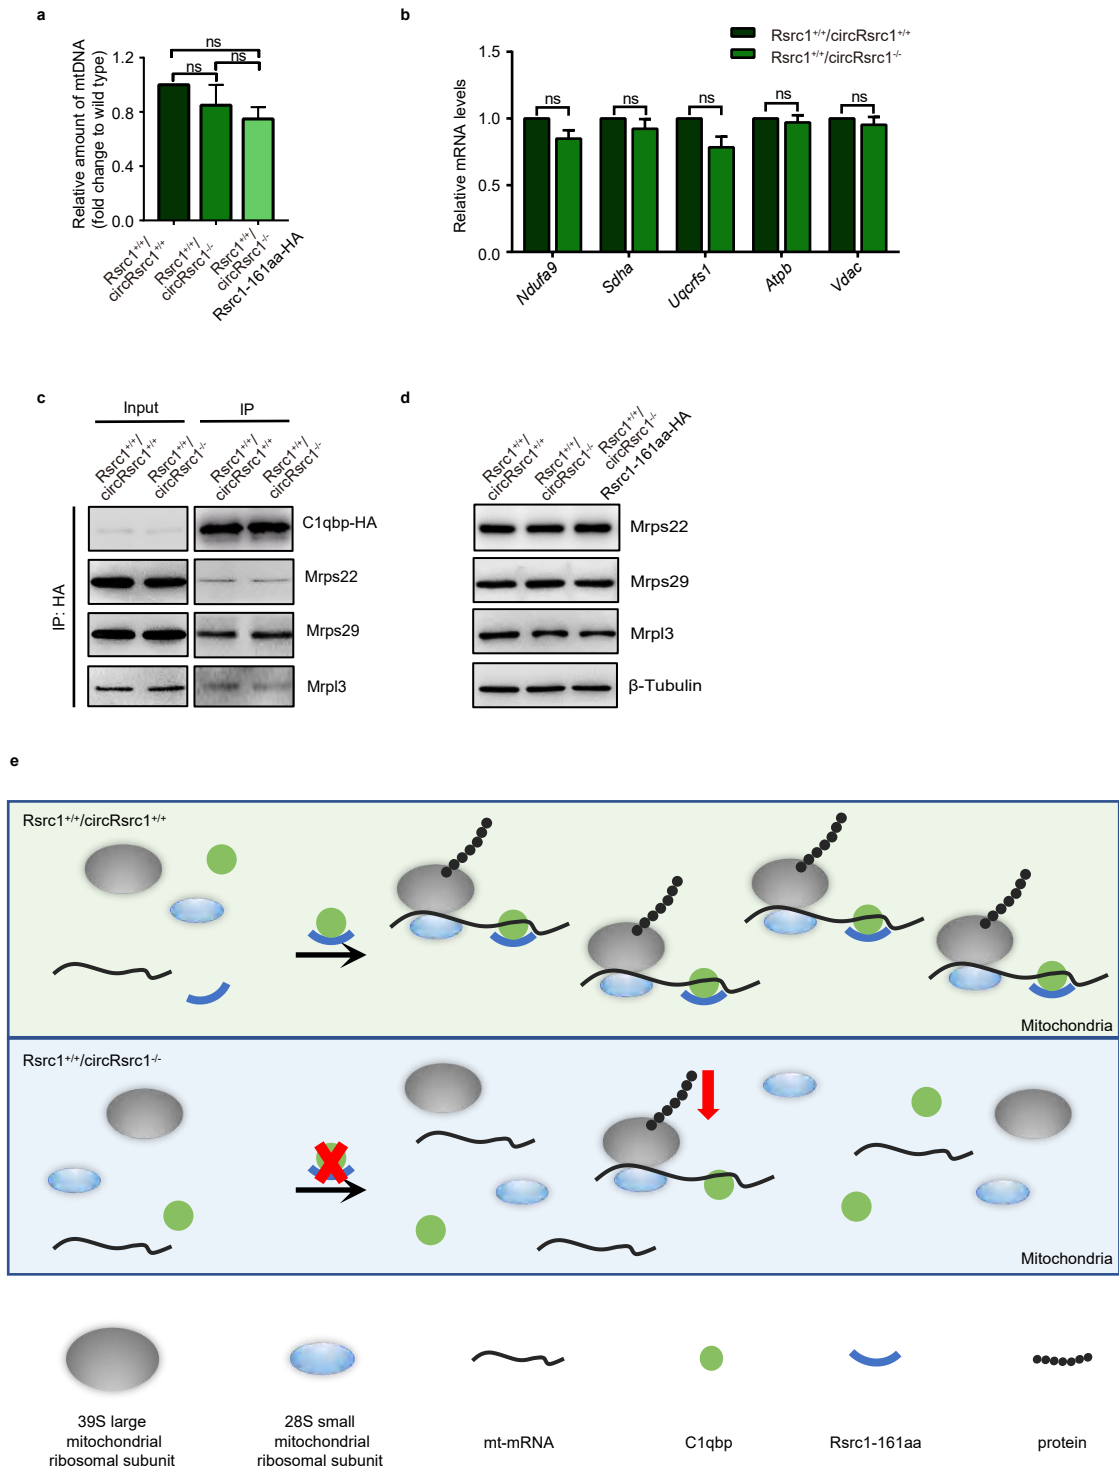

Supplement: 12915_2023_1597_MOESM1_ESM.pdf [file 12915_2023_1597_MOESM1_ESM.pdf]
