# Supplementary material for: A novel protein encoded by circRsrc1 regulates mitochondrial ribosome assembly and translation during spermatogenesis
Source: PubMed Central journal article supplement (PMC10127071; doi:10.1186/s12915-023-01597-z), 2023-04-24

Fig. 1c

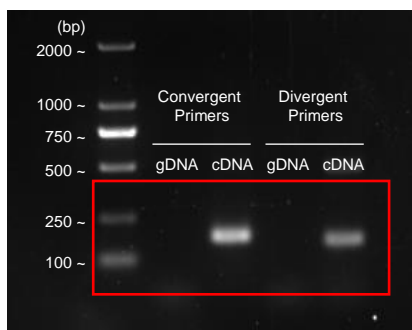

Fig. 1f

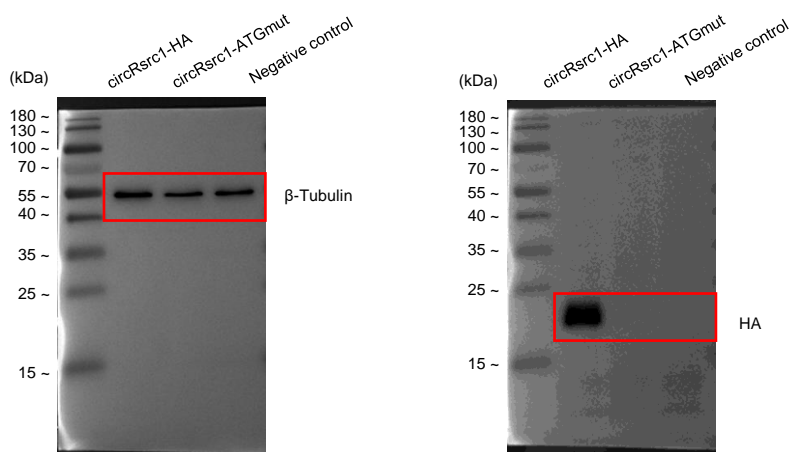

Fig. 2a

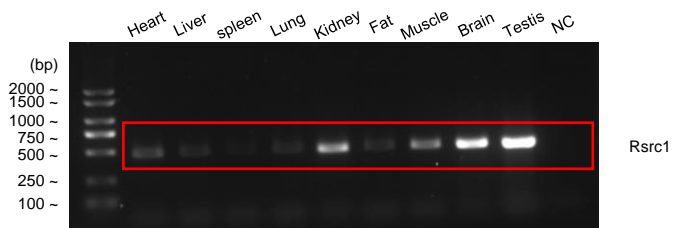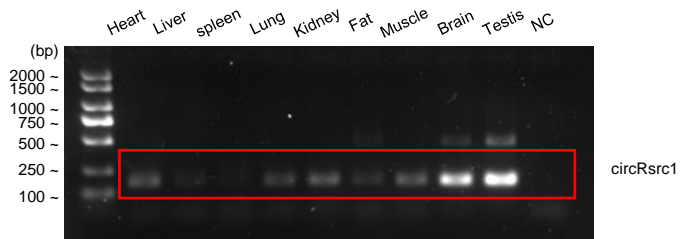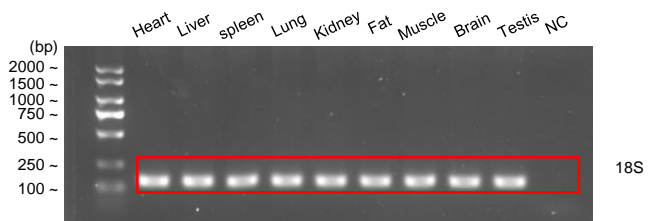

Fig. 3f

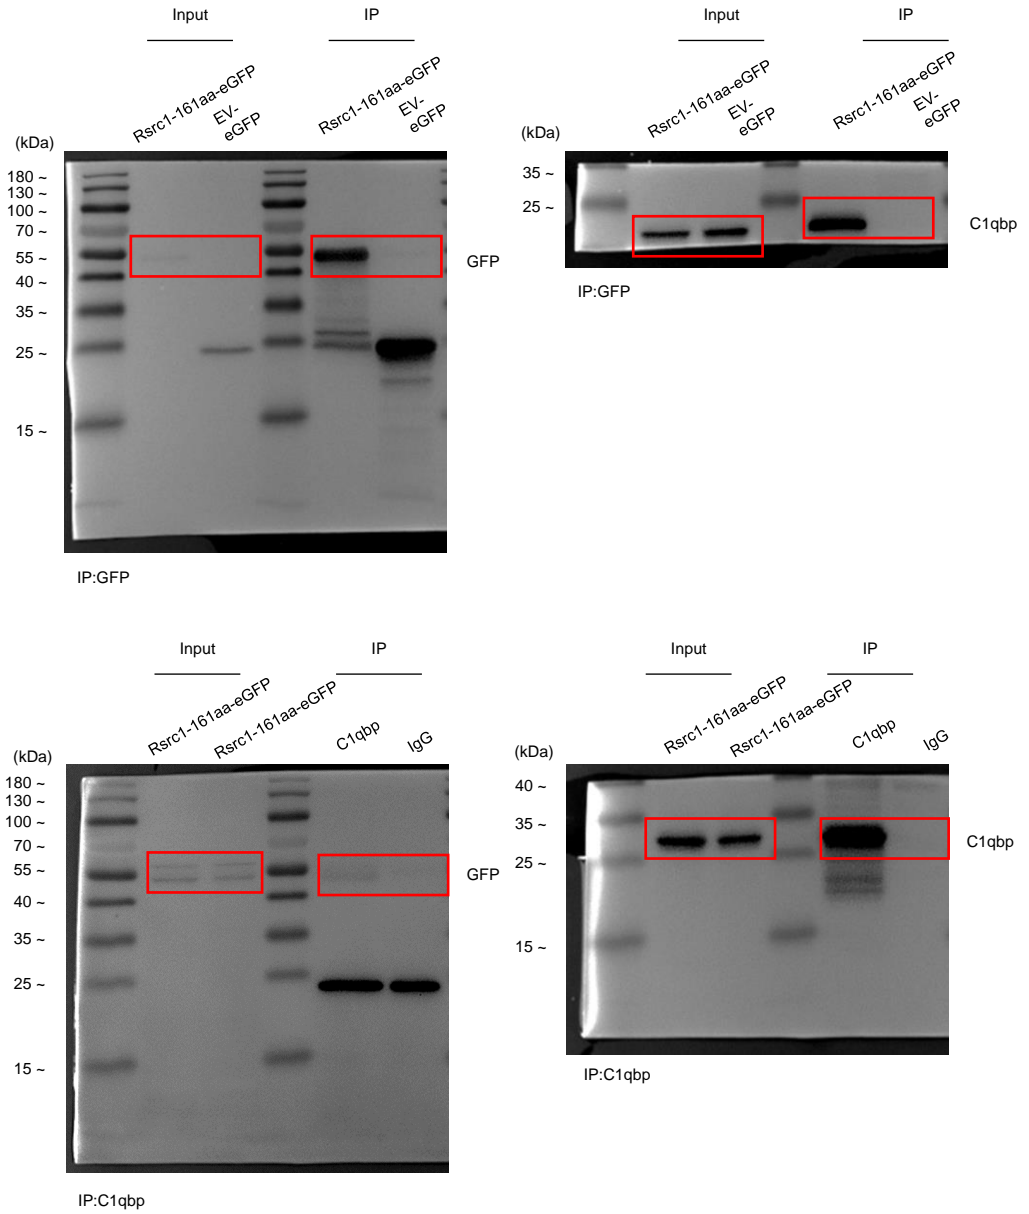

Fig. 5c

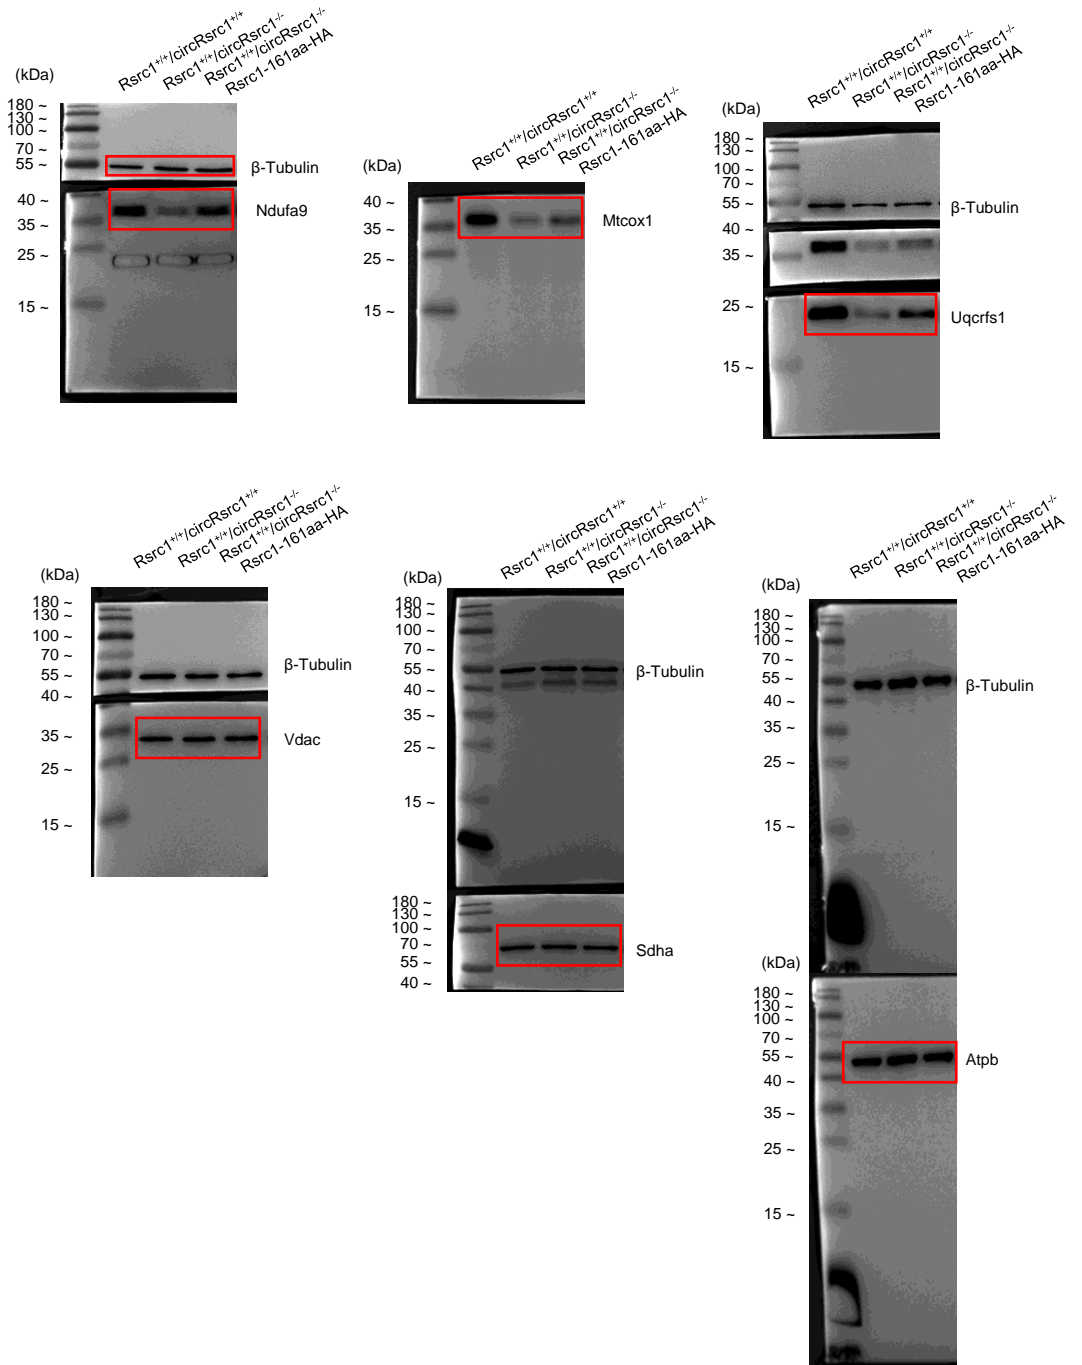

Fig. 5d

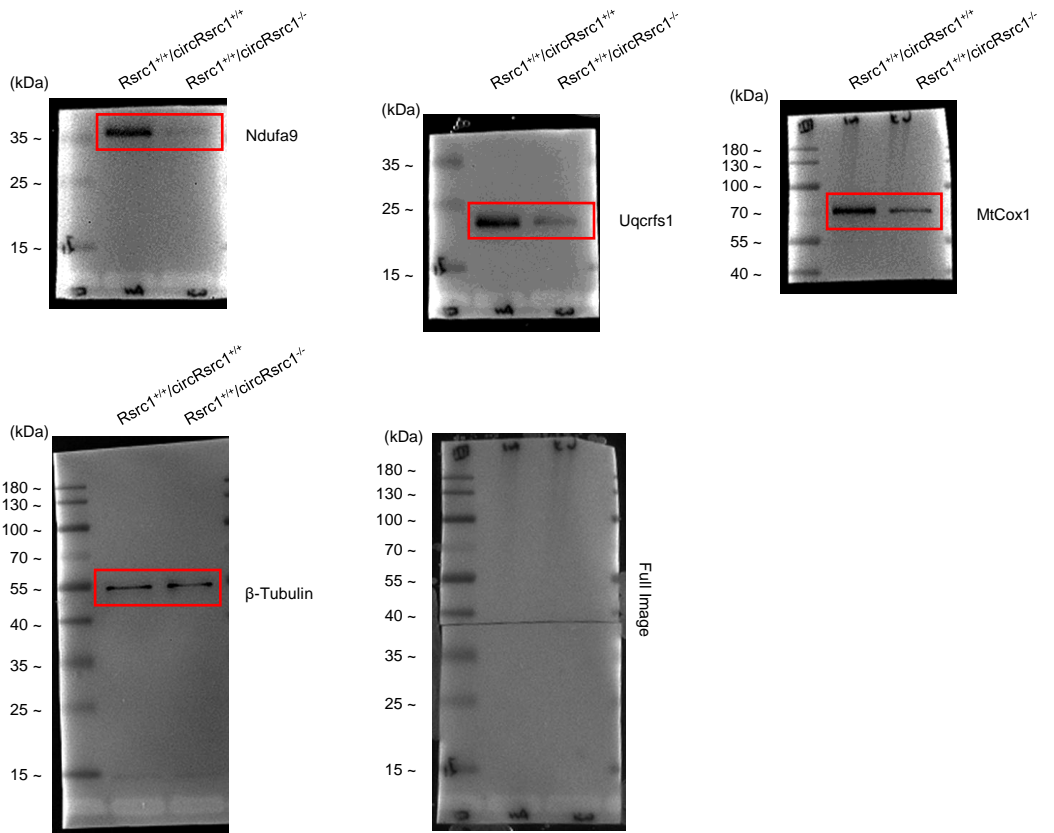

Fig. 5e

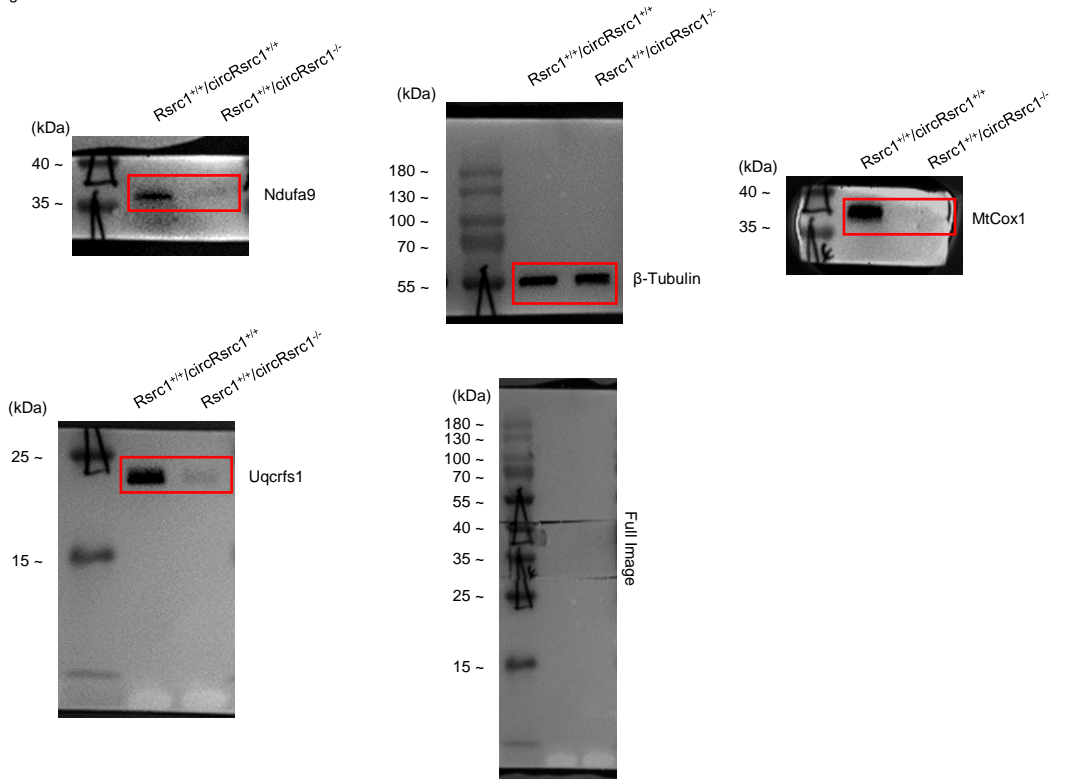

Fig. 5f

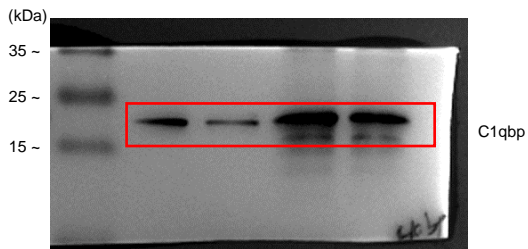

Fig. 5g

Rsrc1<sup>+/+</sup>/circRsrc1<sup>+/+</sup>

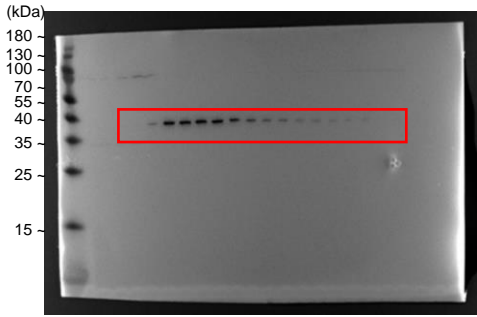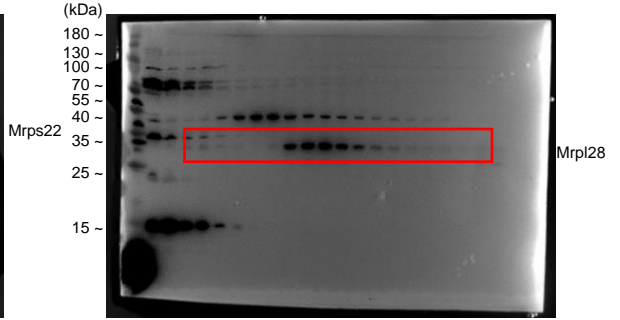

Rsrc1<sup>+/+</sup>/circRsrc1<sup>-/-</sup>

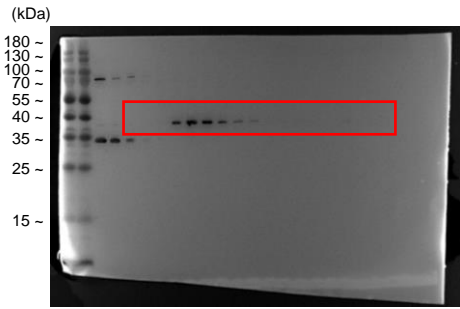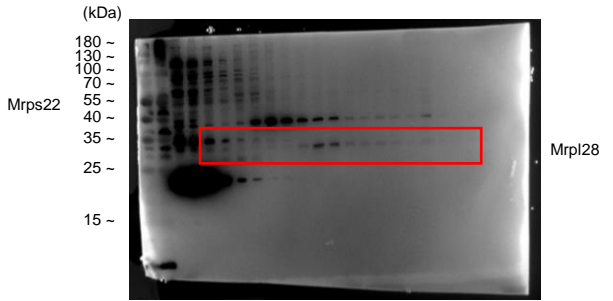

Rsrc1<sup>+/+</sup>/circRsrc1<sup>-/-</sup>  
Rsrc1-161aa-HA

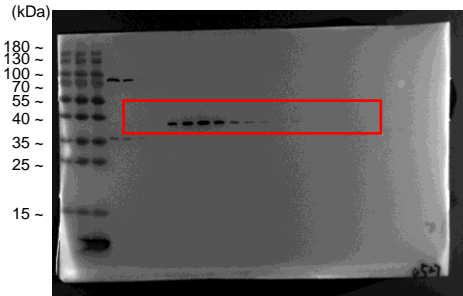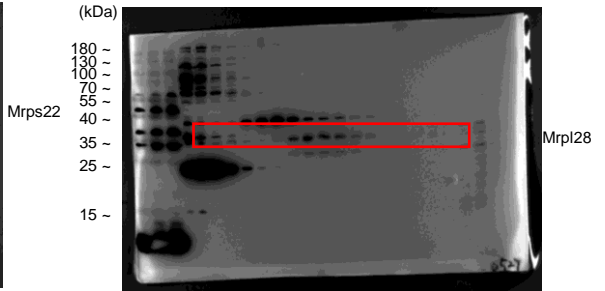

Fig. S2

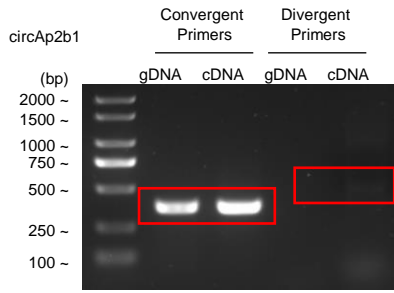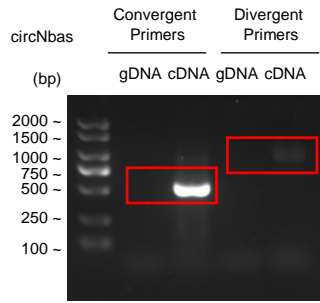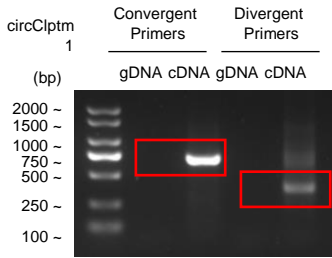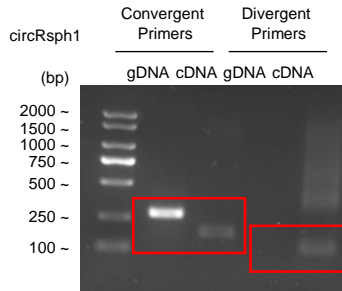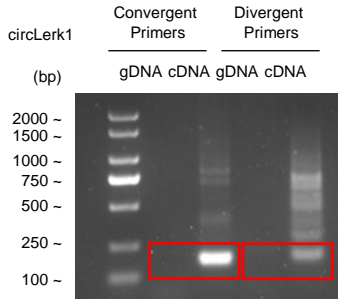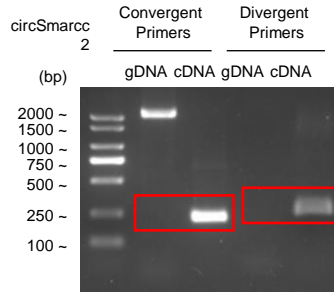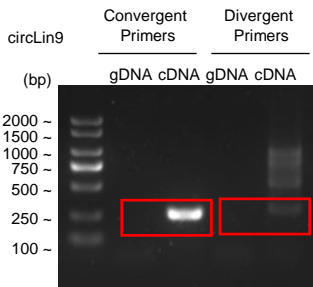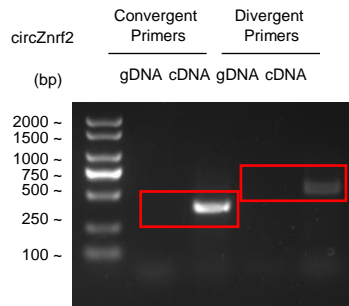



Fig. S3e

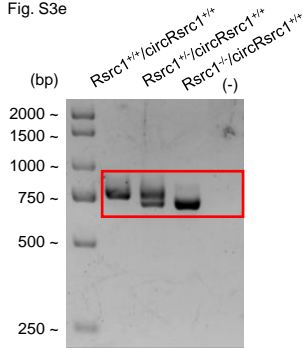

Fig. S3f

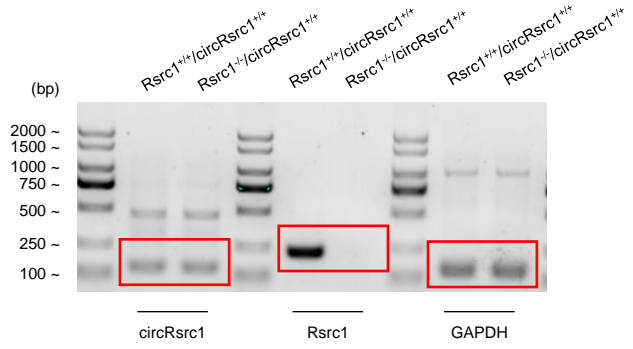

Fig. S3g

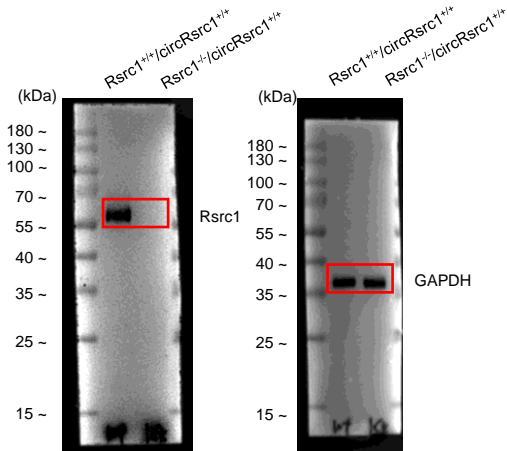

Fig. S3i

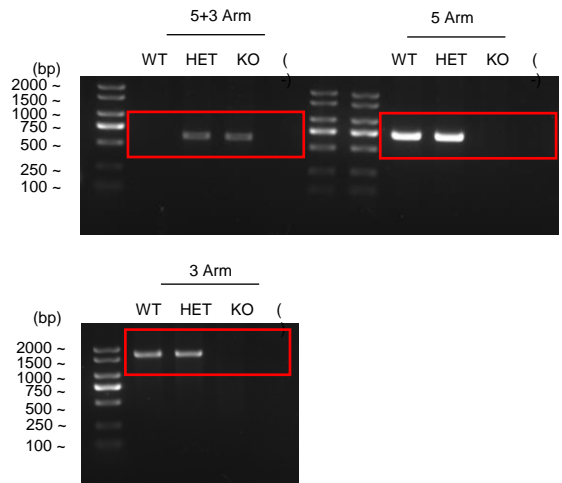

Fig. S3j

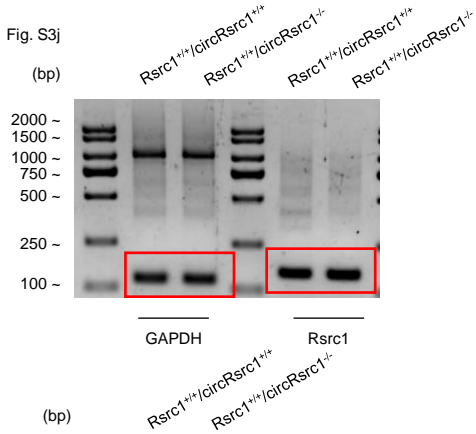

Fig. S3l

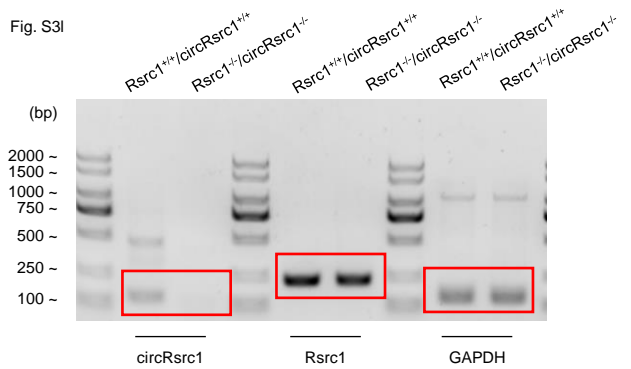

(bp)

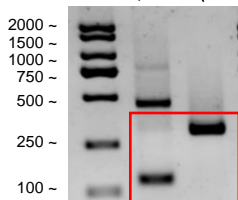

Fig. S3n

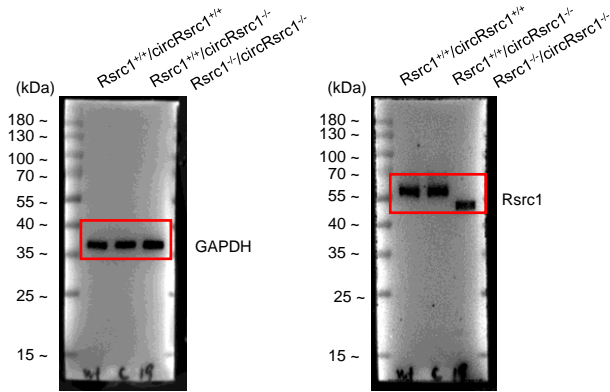

Fig. S5b

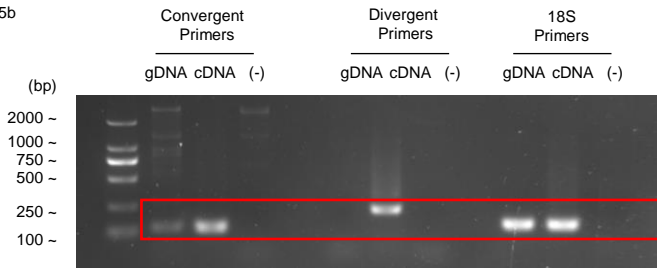

Fig. S5e

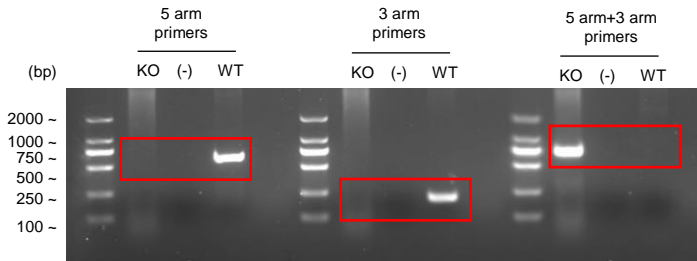

Fig. S5g

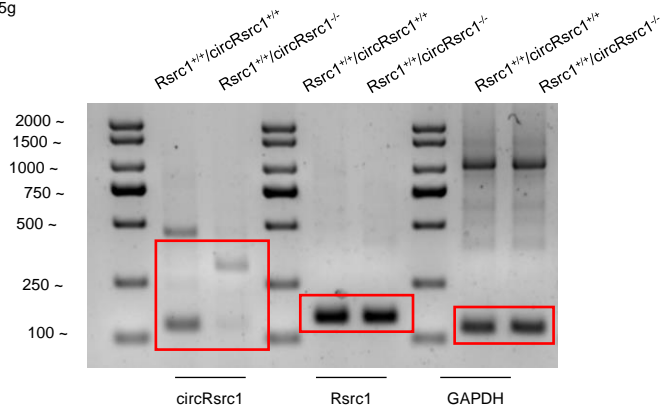

Fig. S6c

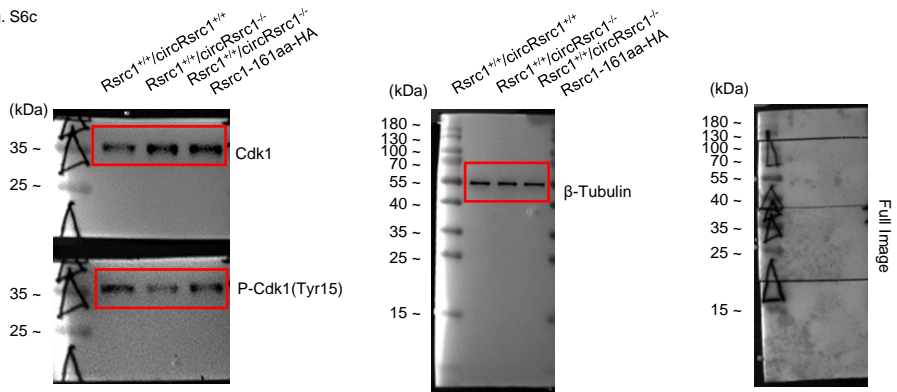

Fig. S7c

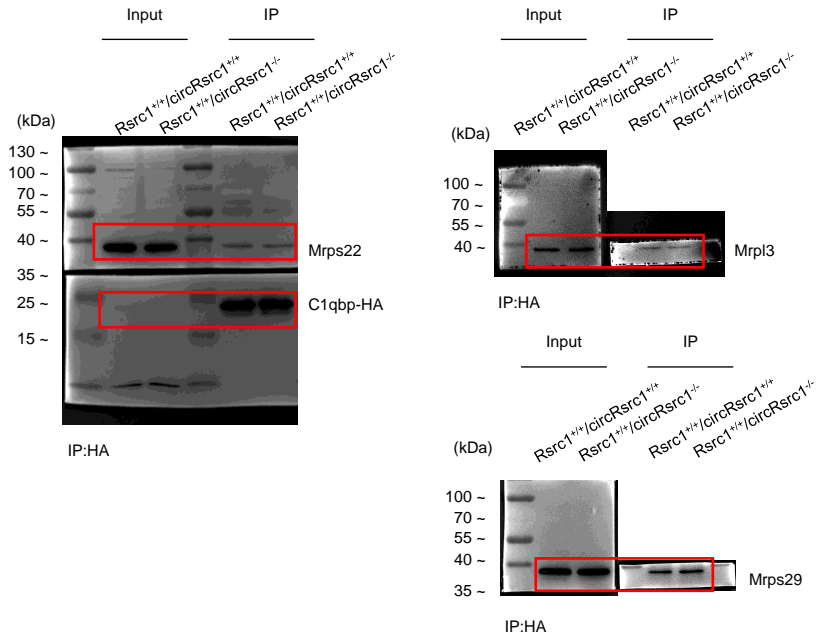

Fig. S7d

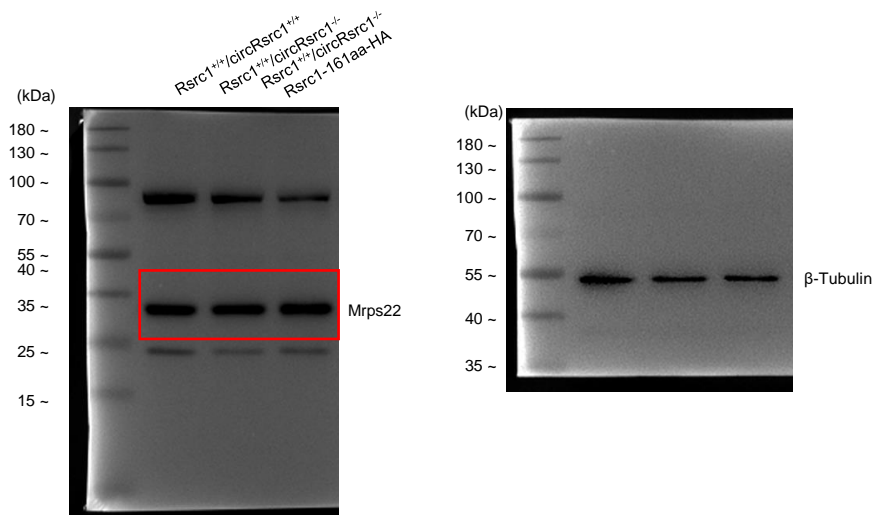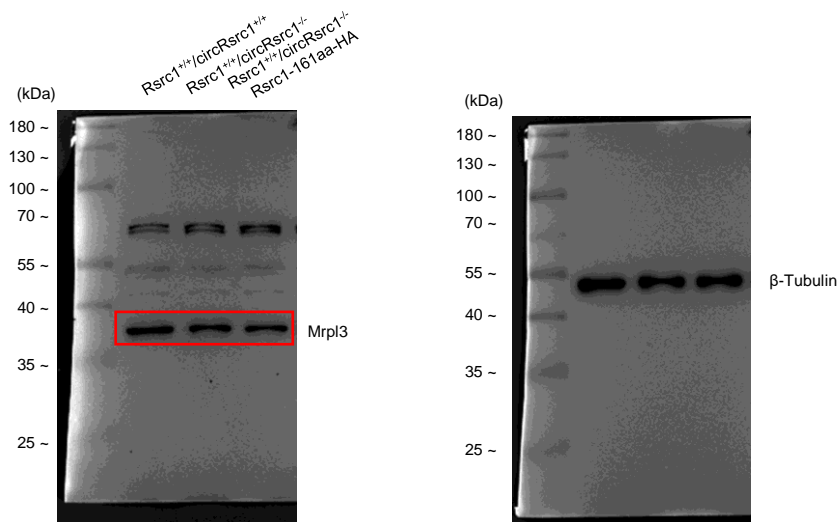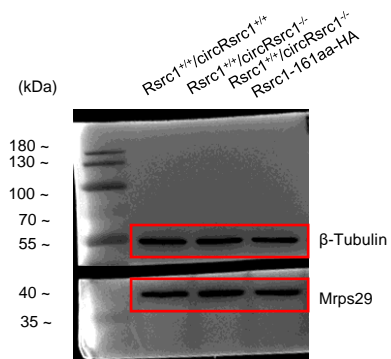

Supplement: 12915_2023_1597_MOESM4_ESM.pdf [file 12915_2023_1597_MOESM4_ESM.pdf]
