# Supplementary material for: A novel protein encoded by circRsrc1 regulates mitochondrial ribosome assembly and translation during spermatogenesis
Source: PubMed Central journal article supplement (PMC10127071; doi:10.1186/s12915-023-01597-z), 2023-04-24
Supplement: 12915_2023_1597_MOESM3_ESM.pdf [file 12915_2023_1597_MOESM3_ESM.pdf]

**Table S2. Isotope-labeled heavy synthetic peptide sequence used for relative targeted quantification by PRM**

| Gene name | Peptide sequence               | Precursor ion(m/z) | Purity grade |
|-----------|--------------------------------|--------------------|--------------|
| Rsrc1     | VKEIEAIESDSFVQQTFR(13C6,15N4)  | 712.699749         | Crude        |
| Rsrc1     | LQLVLEAAAK(13C6,15N2)          | 532.333698         | Crude        |
| Rsrc1     | EIDPDSIPTAIK(13C6,15N2)        | 653.852649         | Crude        |
| CircRsrc1 | EVAEEPGAEGNPIEFK(13C6,15N2)    | 555.297555         | Crude        |
| CircRsrc1 | GLGQKAEPEEMGR(13C6,15N4)       | 706.347317         | Crude        |
| Mtnd1     | GPNIYGPYIGLQPFADAMK(13C6,15N2) | 998.526235         | Crude        |
| Mtnd1     | YSLFGALR(13C6,15N4)            | 468.762487         | Crude        |
| Mtnd2     | LIYSTSLTMFPTNNSK(13C6,15N2)    | 969.989683         | Crude        |
| Mtnd2     | WIIITELMK(13C6,15N2)           | 577.840302         | Crude        |
| Mtnd3     | ANPYECGFDPSTSSAR(13C6,15N4)    | 841.361153         | Crude        |
| Mtnd3     | ECGFDPSTSSAR(13C6,15N4)LPF     | 797.365707         | Crude        |
| Mtnd4     | ISIILDPLTK(13C6,15N2)          | 560.857006         | Crude        |
| Mtnd4     | LTNHMINLQPSHTR(13C6,15N4)      | 557.958952         | Crude        |
| Mtnd5     | SLNLSLK(13C6,15N2)             | 391.746728         | Crude        |
| Mtnd5     | TDANTAALQAILYNR(13C6,15N4)     | 822.932603         | Crude        |
| Mtco1     | AYFTSATMIIAIPITGVK(13C6,15N2)  | 896.493872         | Crude        |
| Mtco1     | WLFSTNHK(13C6,15N2)            | 520.773808         | Crude        |
| Mtco2     | VVLPMEPIR(13C6,15N4)           | 588.856061         | Crude        |
| Mtco2     | LLEVDNR(13C6,15N4)             | 434.741751         | Crude        |
| Mtco3     | EGTYQGHHTPIVQK(13C6,15N2)      | 534.941994         | Crude        |
| Mtstp6    | LHSFQHWLVK(13C6,15N2)          | 651.863489         | Crude        |
| Mtstp6    | QMMLIHTPK(13C6,15N2)           | 553.800654         | Crude        |
| Mt-Cyb    | DVNYGWLIR(13C6,15N4)           | 573.302507         | Crude        |
| Mt-Cyb    | KTHPLFK(13C6,15N2)             | 439.770537         | Crude        |
| Tubb2b    | INVYYNEATGNK(13C6,15N2)        | 697.345523         | Crude        |

**Table S3. Primers used in PCR, RT-PCR and RT-qPCR****1. Primer sets used in RT-PCR analyses of mice testes**

| <b>circRNA name</b> | <b>Primer name</b>       | <b>Primer sequence(5'-3')</b>  | <b>Expected product size (bp)</b> |
|---------------------|--------------------------|--------------------------------|-----------------------------------|
| circRsrc1           | circRsrc1-convergent-F   | CTCTTCAGACAGCAGGACATACA        | 181                               |
|                     | circRsrc1-convergent-R   | CCTGGAACGACTGCGACTTC           |                                   |
|                     | circRsrc1-divergent-F    | CAGAACCAGAAGAAATGGGACGC        | 166                               |
|                     | circRsrc1-divergent-R    | CAGGACCTTGAGTCGGACCT           |                                   |
| circAp2b1           | circAp2b1-convergent-F   | GCAGACTGACAACCTGGAATAA         | 371                               |
|                     | circAp2b1-convergent-R   | CTACAGCATTAGCCACCACCATT        |                                   |
|                     | circAp2b1-divergent-F    | GAGCATCTGTGAGCGAGTAAC          | 539                               |
|                     | circAp2b1-divergent-R    | GGTCTTCATCCTTCAAGCACTT         |                                   |
| circClptm1          | circClptm1-convergent-F  | ACGAGCACTTACAGACTTCAA          | 719                               |
|                     | circClptm1-convergent-R  | TTCCAGCAGAGCAACCTTCAC          |                                   |
|                     | circClptm1-divergent-F   | GGCTCCATCTATATCCATGTCTA        | 277                               |
|                     | circClptm1-divergent-R   | GCCTTGAAGTCTGTGAAGTG           |                                   |
| circLerk1           | circLerk1-convergent-F   | GTTGTCGGATGCAGCCATATTGAG       | 178                               |
|                     | circLerk1-convergent-R   | CTCCTTACAGTTGTCCAGCTCCTT       |                                   |
|                     | circLerk1-divergent-F    | ACCGTACAGGAAGAGCTGACAACA       | 229                               |
|                     | circLerk1-divergent-R    | TGAAGTCTCAACCCAAGTGCCCTCT      |                                   |
| circLin9            | circLin9-convergent-F    | CAGCAACGATGTCAACACCAGAT        | 266                               |
|                     | circLin9-convergent-R    | TGCAGAAGAACATCTCCGAGGTT        |                                   |
|                     | circLin9-divergent-F     | CCCGATGAAATCCCCTCTACCC         | 291                               |
|                     | circLin9-divergent-R     | AGTGGCTTGTCTATGTTTGAGTAG       |                                   |
| circNbas            | circNbas-convergent-F    | GCCACCTATCCAGATGCCTTG          | 532                               |
|                     | circNbas-convergent-R    | GCTTGCCATCCTCCTCACTC           |                                   |
|                     | circNbas-divergent-F     | GCCTCAGAGACAGAAGCCTTG          | 972                               |
|                     | circNbas-divergent-R     | ACCGTGACAGATCGTAGAAGTAAC       |                                   |
| circRsph1           | circRsph1-convergent-F   | CGCAATGAGGTGGGAGAACGAC         | 191                               |
|                     | circRsph1-convergent-R   | AAGGTGCCCTGGCCGTGCTT           |                                   |
|                     | circRsph1-divergent-F    | CACGGCCAAGGCACCTTTATCTA        | 113                               |
|                     | circRsph1-divergent-R    | CGTTGGGCAGTCGTGCTTTC           |                                   |
| circSmarcc2         | circSmarcc2-convergent-F | GCCAACCAACAAGTCTCTGTCCAG       | 234                               |
|                     | circSmarcc2-convergent-R | ACATTGCGGTCCATGCGTGATG         |                                   |
|                     | circSmarcc2-divergent-F  | GAACCTAGAAGAAGTACATACAAGCAGAAC | 265                               |
|                     | circSmarcc2-divergent-R  | ACATTGCGGTCCATGCGTGAT          |                                   |
| circZnf2            | circZnf2-convergent-F    | TACGGCTCACAGGACTCAGT           | 393                               |
|                     | circZnf2-convergent-R    | GTGCTCTGGACAAGATCTATTGAC       |                                   |
|                     | circZnf2-divergent-F     | CAATATGCCTTGAAGAAGTCT          | 554                               |
|                     | circZnf2-divergent-R     | TACTCAGCACATCCTCATT            |                                   |

**2. Primer sets used in PCR analyses of mice genotypes**

| <b>Mouse name</b>                              | <b>Primer name</b>                                        | <b>Primer sequence(5'-3')</b> | <b>Expected product size (bp)</b> |
|------------------------------------------------|-----------------------------------------------------------|-------------------------------|-----------------------------------|
| Rsrc1 <sup>-/-</sup> /circRsrc1 <sup>+/+</sup> | Rsrc1 <sup>-/-</sup> /circRsrc1 <sup>+/+</sup> -F         | TTTCTGCTGGTTCTGTGGGATTCC      | 773                               |
|                                                | Rsrc1 <sup>-/-</sup> /circRsrc1 <sup>+/+</sup> -R         | AAACATGCAAGCCCTGACCTTCTT      |                                   |
| Rsrc1 <sup>+/+</sup> /circRsrc1 <sup>-/-</sup> | Rsrc1 <sup>+/+</sup> /circRsrc1 <sup>-/-</sup> -5+3 arm-F | GTACAGCCTCAGTAATAGTGTGAC      | 621                               |
|                                                | Rsrc1 <sup>+/+</sup> /circRsrc1 <sup>-/-</sup> -5+3 arm-R | GTCTTTGCCTTTATCCTTCTCCTT      |                                   |
| Rsrc1 <sup>+/+</sup> /circRsrc1 <sup>-/-</sup> | Rsrc1 <sup>+/+</sup> /circRsrc1 <sup>-/-</sup> -5 arm-F   | TGGTCTCTCAAGGTCACCTCT         | 717                               |

|                       |                              |                          |      |
|-----------------------|------------------------------|--------------------------|------|
|                       | Rsrc1+/+/circRsrc1/--5 arm-R | AGATGAGCAGGGTCCAATGAGAAA |      |
|                       | Rsrc1+/+/circRsrc1/--3 arm-F | GGCTTCTACTTGCTTACCTGTGTT | 1653 |
|                       | Rsrc1+/+/circRsrc1/--3 arm-R | TGTATCTCGCTTTGCCACTGTTAC |      |
| Rsrc1-/-/circRsrc1-/- | Rsrc1-/-/circRsrc1-/-F       | TGGTCCTCCTACAAGGTCCTCT   | 717  |
|                       | Rsrc1-/-/circRsrc1-/-R       | AGATGAGCAGGGTCCAATGAGAAA |      |

### 3. Primer sets used in RT-PCR and RT-qPCR analyses of mice testes

| Primer name  | Primer sequence(5'-3')    | Expected product size (bp) |
|--------------|---------------------------|----------------------------|
| circRsrc1-F1 | AGAAGTCGCAGTCGTTCAGG      | 128                        |
| circRsrc1-R1 | TCCCTCTTGCTTCTGCTTTCCTCTT |                            |
| circRsrc1-F2 | CAGAACCAGAAGAAATGGGACGC   | 166                        |
| circRsrc1-R2 | CAGGACCTTGAGTCGGACCT      |                            |
| Rsrc1-F      | GTAGCAGGTCCAGGGACAGAGA    | 148                        |
| Rsrc1-R      | GGAGGCAGATGTTCTAATCCAGCT  |                            |
| U6-F         | ACCCTGAGAAATACCCTCACAT    | 62                         |
| U6-R         | GACGACTGAGCCCCTGATG       |                            |
| Cox2-F       | ACGAAATCAACAACCCCGTA      | 172                        |
| Cox2-R       | GGCAGAACGACTCGGTTATC      |                            |
| GAPDH-F      | AGGTCGGTGTGAACGGATTTG     | 123                        |
| GAPDH-R      | TGTAGACCATGTAGTTGAGGTCA   |                            |
| 18S-F        | TAACGAACGAGACTCTGGCAT     | 138                        |
| 18S-R        | CGGACATCTAAGGGCATCACAG    |                            |

### 4. Primer sets used in RT-qPCR analyses of cell samples

| Primer name            | Primer sequence(5'-3')  |
|------------------------|-------------------------|
| circRsrc1-divergent-F  | AAGAAGTCGCAGTCGTTCAG    |
| circRsrc1-divergent-R  | CAGGACCTTGAGTCGGACCT    |
| circRsrc1-convergent-F | GAACCCGTAGCAGGTCAG      |
| circRsrc1-convergent-R | CCAGAATCCCCGCGTTTGAT    |
| Gapdh-F                | AGGTCGGTGTGAACGGATTTG   |
| Gapdh-R                | TGTAGACCATGTAGTTGAGGTCA |
| Ndufa9-F               | GTCCGCTTTCGGGTGTAGTA    |
| Ndufa9-R               | CCTCCTTTCGGGTGAGGTA     |
| Sdha-F                 | GCGGTGGTCACCTTGATCC     |
| Sdha-R                 | CCTCTGTAGAAGCGTCTGAATG  |
| Uqcrls1-F              | GAGCCACCTGTCTGGATGTG    |
| Uqcrls1-R              | GCACGACGATAGTCAGAGAAGTC |
| Atpb-F                 | GGTTCATCCTGCCAGAGACTA   |
| Atpb-R                 | AATCCCTCATCGAACTGGACG   |
| Vdac-F                 | CCCACATACGCCGATCTTGG    |
| Vdac-R                 | GTGGTTTCCGTGTGGCAGA     |
| Nd1-F                  | GGATCCGAGCATCTTATCCA    |
| Nd1-R                  | GGTGGTACTCCGCTGTAAA     |
| Nd2-F                  | AGGGATCCCACTGCACATAG    |
| Nd2-R                  | CTCCTCATGCCCTATGAAA     |
| Nd3-F                  | TTCGACCTACAAGCTCTGC     |
| Nd3-R                  | TGAATTGCTCATGGTAGTGA    |

|        |                        |
|--------|------------------------|
| Nd4-F  | CCACTGCTAATGCCCCTCAT   |
| Nd4-R  | CTTCAACATGGGCTTTTGGT   |
| Nd5-F  | TCCTACTGGTCCGATTCCAC   |
| Nd5-R  | TTTGATGTCGTTTTGGGTGA   |
| Nd6-F  | CGATCCACCAAACCCTAAAA   |
| Nd6-R  | TTGGTTGTCTTGGGTTAGCA   |
| Cox1-F | GGTCAACCAGGTGCACCTTTT  |
| Cox1-R | TGGGGCTCCGATTATTAGTG   |
| Cox2-F | ACGAAATCAACAACCCCGTA   |
| Cox2-R | GGCAGAACGACTCGGTATC    |
| Cox3-F | CAAGGCCACCACACTCCTAT   |
| Cox3-R | ATTCTGTGGAGGTCAGCA     |
| Atp6-F | CCTTCCACAAGGAACCTCAA   |
| Atp6-R | GGTAGCTGTTGGTGGGCTAA   |
| Cytb-F | TGAGGGGGCTTCTCAGTAGA   |
| Cytb-R | CTGTTTCGTGGAGGAAGAGG   |
| 18S-F  | TAACGAACGAGACTCTGGCAT  |
| 18S-R  | CGGACATCTAAGGGCATCACAG |

#### 5. Primer sets used in RT-PCR analyses of cell samples

| Primer name            | Primer sequence(5'-3')   | Expected product size (bp) |
|------------------------|--------------------------|----------------------------|
| circRsrc1-convergent-F | GAACCCGTAGCAGGTCCAG      | 121                        |
| circRsrc1-convergent-R | CCAGAATCCCCGCGTTTGAT     |                            |
| circRsrc1-divergent-F  | AAGAAGTCGCAGTCGTCCAG     | 232                        |
| circRsrc1-divergent-R  | CAGGACCTTGAGTCGGACCT     |                            |
| 18S-F                  | TAACGAACGAGACTCTGGCAT    | 138                        |
| 18s-R                  | CGGACATCTAAGGGCATCACAG   |                            |
| circRsrc1-F            | AGAAGTCGCAGTCGTCCAGG     | 128                        |
| circRsrc1-R            | TCCTCTTGCTTCTGCTTTCCTCTT |                            |
| Rsrc1-F                | GTAGCAGGTCCAGGGACAGAGA   | 148                        |
| Rsrc1-R                | GGAGGCAGATGTTCTAATCCAGCT |                            |
| GAPDH-F                | AGGTCGGTGTGAACGGATTTG    | 123                        |
| GAPDH-R                | TGTAGACCATGTAGTTGAGGTCA  |                            |

#### 6. Primer sets used in PCR analyses of cell genotypes

| Primer name                   | Primer sequence(5'-3')    | Expected product size (bp) |
|-------------------------------|---------------------------|----------------------------|
| Rsrc1+/+/circRsrc1/-5+3 arm-F | GTTGGTCCTCCTACAAGGTCACT   | 685                        |
| Rsrc1+/+/circRsrc1/-5+3 arm-R | AGAGTCAGTAACACAGTGTGAGGT  |                            |
| Rsrc1+/+/circRsrc1/-5 arm-F   | GTACAGCCTCAGTAATAGTGTGAG  | 654                        |
| Rsrc1+/+/circRsrc1/-5 arm-R   | CTTCCACCATCATCCAGAGAATG   |                            |
| Rsrc1+/+/circRsrc1/-3 arm-F   | GGGTCAATGTCATGTTTCAATCTCT | 216                        |
| Rsrc1+/+/circRsrc1/-3 arm-R   | ACAAACAGAGTCAGTAACACAGTG  |                            |

**Table S4. Antibodies and dilution concentrations**

| Antibody          | Supplier                  | RRID        | Cat#       | Dilution (WB)           |
|-------------------|---------------------------|-------------|------------|-------------------------|
| HA                | MBL                       | AB_10951811 | M180-3     | 1:1000 IF, IP :1:100    |
| $\beta$ -Tubulin  | Abways                    | AB_10971396 | AB0039     | 1:5000                  |
| Rsrc1             | Invitrogen                | AB_2720896  | PA5-77169  | 1:1000                  |
| GAPDH             | Abways                    | AB_10971398 | AB0036     | 1:5000                  |
| C1QBP             | Sino Biological           | AB_2927404  | 50199-T62  | 1:1000 IF 1:500 IP 1:50 |
| GFP               | Abways                    | AB_2333135  | AB0005     | 1:5000                  |
| GFP               | EnoGene                   | AB_2927405  | E12-026    | IP, 1:50                |
| Cdk1              | Beyotime                  | AB_2927406  | AF1516     | 1:1000                  |
| p-Cdk1(Tyr15)     | Cell Signaling Technology | AB_2927409  | 4539T      | 1:1000                  |
| NDUFA9            | Invitrogen                | AB_1501787  | 459100     | 1:1000                  |
| SDHA              | Invitrogen                | AB_1607896  | 459200     | 1:5000                  |
| UQCRCF1           | Invitrogen                | AB_2725632  | MA5-27471  | 1:1000                  |
| MTCO1             | Invitrogen                | AB_2532240  | 459600     | 1:1000                  |
| ATPB              | Proteintech               | AB_2061878  | 17247-1-AP | 1:1000                  |
| VDAC              | Cell Signaling Technology | AB_2927410  | 4866T      | 1:1000                  |
| MRPL3             | Abcam                     | AB_2927411  | ab151326   | 1:1000                  |
| MRPL28            | Proteintech               | AB_10859785 | 21604-1-AP | 1:1000                  |
| MRPS22            | Proteintech               | AB_2146488  | 10984-1-AP | 1:1000                  |
| MRPS29            | BD Biosciences            | AB_2927412  | 610662     | 1:1000                  |
| normal rabbit IgG | Beyotime                  | AB_2905533  | A7016      | IP, 1:50                |
| normal rabbit IgG | Cell Signaling Technology | AB_1031062  | 2729S      | IF, 1:100               |
